# Supplementary material for: Comparative bioinformatic and proteomic approaches to evaluate the outer membrane proteome of the fish pathogen Yersinia ruckeri
Source: PubMed Central journal article supplement (PMC6447952; doi:10.1016/j.jprot.2019.02.014), 2019-05-15
Supplement: mmc1.pdf [file mmc1.pdf]

1 SUPPLEMENTARY INFORMATION

2 **Comparative bioinformatic and proteomic**  
3 **approaches to evaluate the outer membrane**  
4 **proteome of the fish pathogen *Yersinia ruckeri***

5

6 **Michael J. Ormsby<sup>a</sup>, Edward Grahame<sup>a</sup>, Richard Burchmore<sup>a,b</sup> and Robert L. Davies<sup>a\*</sup>.**

7

8 <sup>a</sup>*Institute of Infection, Immunity and Inflammation, College of Medical, Veterinary and Life*  
9 *Sciences, Sir Graeme Davies Building, University of Glasgow, Glasgow G12 8TA, UK*

10 <sup>b</sup>*Polyomics, Institute of Infection, Immunity and Inflammation, College of Medical, Veterinary*  
11 *and Life Sciences, TCRC, University of Glasgow, Glasgow G12 1QH*

12

13 \*Corresponding author email: [Robert.Davies@glasgow.ac.uk](mailto:Robert.Davies@glasgow.ac.uk)

14

15 **CONTENTS**

16 Fig. S-1 Schematic depicting the gel-free and gel-based techniques for outer membrane  
17 protein identification.

18 Fig. S-2 The excised bands from OMP profiles of representative isolates of *Y. ruckeri*  
19 separated by 1D SDS-PAGE.

20 Table S-1 List of confidently predicted OMPs from four publicly available genomes of *Y.*  
21 *ruckeri*.

22 Table S-2 Proteins identified by gel-free proteomic analysis of eight isolates of *Y. ruckeri*.

23 Table S-3 Additional OMPs identified through gel-based proteomics of *Y. ruckeri*.

24 Table S-4 Proteins identified in eight isolates of *Y. ruckeri* through a combination of gel-  
25 free and gel-based proteomic techniques.

26 Table S-5 Functional categories of 141 predicted OMPs in four *Y. ruckeri* genomes.

27 **Fig. S-1 Schematic depicting the gel-free and gel-based techniques for outer**  
28 **membrane protein identification.** The outer membrane was extracted and enriched by  
29 Sarkosyl extraction (A). Each independent outer membrane extract was divided into three  
30 portions and analysed by (B) gel-free and gel-based (individual band [I-B; C.1] and lane-  
31 section [L-S; C.2]) proteomic techniques. In the I-B format individual protein bands were  
32 excised, while in the L-S format the entire lane was excised. Both gel-free and gel-based  
33 samples were subjected to trypsin digestion (D), analysed by LC-MS/MS (E) and the proteins  
34 subsequently identified using MASCOT and literature searching (F).

35 **Fig. S-2 The excised bands from OMP profiles of representative isolates of *Y.***  
36 ***ruckeri* separated by 1D SDS-PAGE.** Isolates RD6, RD28, RD64, RD124 (recovered from  
37 Rainbow trout); and isolates RD354, RD366, RD382 and RD420 (recovered from Atlantic  
38 salmon) are in the order indicated. Three replicates are represented by 1, 2 and 3. Lane 7 of  
39 each panel represents a MW standard (GE Healthcare, UK). Identified proteins are labelled  
40 numerically and correspond to Tables S-3 and S-4. Numbers labelled in red indicate proteins  
41 that were uniquely identified using gel based methods.

42 **Table S-1 List of confidently predicted OMPs from four publicly available genomes of *Y. ruckeri*.**

| Protein                               | Function        | MW (Da)                             | Genome (GenBank Accession number) |            |            |            | Location       |                |                | Core proteins <sup>d</sup> |   |
|---------------------------------------|-----------------|-------------------------------------|-----------------------------------|------------|------------|------------|----------------|----------------|----------------|----------------------------|---|
|                                       |                 |                                     | ATCC29473                         | CSF007-82  | 37551      | YRB        | 1 <sup>a</sup> | 2 <sup>b</sup> | 3 <sup>c</sup> |                            |   |
| <b>1. OM biogenesis and integrity</b> |                 |                                     |                                   |            |            |            |                |                |                |                            |   |
| 1                                     | BamA/YaeT/Omp85 | BAM complex                         | 88100                             | KGA50688.1 | CEK28575.1 | KFE37550.1 | AJI95279.1     | +              | +              | +                          | + |
| 2                                     | BamB            | BAM complex                         | 42300                             | KGA51489.1 | CEK28417.1 | KFE40157.1 | AJI96267.1     | -              | +              | +                          | + |
| 3                                     | BamC/NlpB       | BAM complex                         | 38300                             | KGA51611.1 | CEK28370.1 | KFE40200.1 | AJI95961.1     | +              | +              | +                          | + |
| 4                                     | BamD/YfiO       | BAM complex                         | 27400                             | KGA49534.1 | CEK26610.1 | KFE37895.1 | AJI93676.1     | -              | -              | +                          | + |
| 5                                     | BamE/SmpA       | BAM complex                         | 12500                             | KGA51354.1 | CEK28487.1 | KFE40087.1 | AJI95242.1     | -              | -              | +                          | + |
| 6                                     | LolB/HemM       | Chaperone and lipoprotein transport | 24200                             | KGA49330.1 | CEK27340.1 | KFE39446.1 | -              | -              | -              | +                          | + |
| 7                                     | Lpp (Brauns)    | Anchors peptidoglycan to OM         | 8400                              | KGA51422.1 | CEK27669.1 | KFE39275.1 | AJI94418.1     | -              | -              | +                          | + |
| 8                                     | LptD/Imp        | LPS assembly                        | 89700                             | KGA50232.1 | CEK26380.1 | KFE40530.1 | AJI93953.1     | +              | +              | +                          | + |
| 9                                     | LptE/RlpB       | LPS assembly                        | 21000                             | KGA49081.1 | CEK26865.1 | KFE38612.1 | AJI94665.1     | -              | -              | +                          | + |
| 10                                    | OmpA            | OM integrity, porin, adherence      | 37800                             | KGA49573.1 | CEK27184.1 | KFE40006.1 | AJI95876.1     | +              | +              | +                          | + |
| 11                                    | Pal             | Peptidoglycan associated            | 18100                             | KGA49271.1 | CEK26938.1 | KFE37976.1 | AJI95644.1     | -              | -              | +                          | + |
| 12                                    | Slp family      | Structural and OM stabilisation     | 20600                             | KGA50105.1 | -          | KFE39499.1 | AJI94566.1     | -              | -              | +                          | + |
| 13                                    | SlyB            | Membrane integrity                  | 15300                             | KGA50971.1 | CEK27645.1 | KFE39255.1 | AJI95837.1     | -              | -              | +                          | + |
| 14                                    | VacJ/MlaA       | Phospholipid homeostasis            | 28800                             | KGA50830.1 | CEK28278.1 | KFE37380.1 | AJI93751.1     | -              | -              | +                          | + |
| 15                                    | YbhG            | Membrane anchor protein             | 35700                             | -          | CEK26984.1 | KFE38061.1 | -              | +              | +              | +                          | + |
| <b>2. Transport and receptor</b>      |                 |                                     |                                   |            |            |            |                |                |                |                            |   |
| 16                                    | Blc             | Lipid storage/transport             | 20600                             | -          | CEK26156.1 | -          | -              | -              | -              | +                          | + |
| 17                                    | BtuB            | Vitamin B12 transport               | 69900                             | KGA46996.1 | CEK29186.1 | KFE37752.1 | AJI94185.1     | +              | +              | +                          | + |
| 18                                    | CsuB            | Fimbrial chaperone (Type I pilus)   | 18600                             | KGA43942.1 | -          | -          | -              | +              | -              | -                          | + |
| 19                                    | CsuC            | Fimbrial chaperone (Type I pilus)   | 28700                             | KGA44131.1 | -          | KFE39562.1 | AJI95148.1     | -              | -              | +                          | + |

43

44

45 **Table S-1 Continued**

| Protein | Function   | MW<br>(Da)                             | Genome (GenBank Accession number) |            |            |            | Location       |                |                | Core<br>proteins <sup>d</sup> |   |
|---------|------------|----------------------------------------|-----------------------------------|------------|------------|------------|----------------|----------------|----------------|-------------------------------|---|
|         |            |                                        | ATCC29473                         | CSF007-82  | 37551      | YRB        | 1 <sup>a</sup> | 2 <sup>b</sup> | 3 <sup>c</sup> |                               |   |
| 20      | CsuD       | Fimbrial usher (Type I pilus)          | 86400                             | KGA44132.1 | -          | -          | AJI96073.1     | +              | +              | -                             |   |
| 21      | CsuE-like  | Surface-fimbriae tip adhesin           | 34500                             | -          | CEK25859.1 | KFE39564.1 | AJI93735.1     | +              | -              | +                             | + |
| 22      | FadL/OmpP1 | Fatty acid/Hydrophobic compound trans. | 46100                             | KGA51106.1 | CEK28277.1 | KFE37381.1 | AJI96387.1     | +              | +              | +                             | + |
| 23      | FhuA       | Ferric hydroxymate receptor            | 81700                             | KGA50060.1 | CEK28777.1 | KFE37693.1 | AJI95410.1     | +              | +              | +                             | + |
| 24      | FiuA       | Iron transport                         | 78400                             | KGA49280.1 | -          | KFE38314.1 | AJI93637.1     | +              | +              | +                             | + |
| 25      | HasR       | Iron transport                         | 93100                             | KGA47003.1 | CEK29201.1 | KFE37766.1 | AJI96066.1     | +              | +              | -                             | + |
| 26      | LamB       | Maltoporin                             | 47600                             | KGA43775.1 | CEK28986.1 | KFE40355.1 | AJI96368.1     | +              | +              | +                             | + |
| 27      | MalE       | Maltose export                         | 43800                             | KGA43809.1 | -          | -          | -              | -              | -              | +                             |   |
| 28      | OmpC.1     | Porin (Small molecules)                | 40200                             | KGA49862.1 | CEK28175.1 | KFE39990.1 | AJI96611.1     | +              | +              | +                             | + |
| 29      | OmpC.2     | Porin (Small molecules)                | 40000                             | KGA51002.1 | CEK27297.1 | KFE39406.1 | AJI96049.1     | +              | +              | +                             | + |
| 30      | OmpE       | Inorganic phosphate uptake             | 39900                             | KGA49176.1 | CEK27010.1 | KFE38036.1 | AJI94786.1     | +              | +              | +                             | + |
| 31      | OmpF       | Porin (Small molecules)                | 41400                             | KGA49458.1 | CEK27167.1 | KFE38186.1 | AJI94673.1     | +              | +              | +                             | + |
| 32      | OmpL/KdgM  | Porin (oligogalacturonides)            | 26700                             | KGA49549.1 | -          | -          | AJI96240.1     | +              | +              | +                             |   |
| 33      | OmpW       | Small hydrophobic compound transport   | 23300                             | -          | CEK27485.1 | KFE39106.1 | AJI94704.1     | +              | +              | +                             | + |
| 34      | OmpX       | Virulence related                      | 18400                             | KGA49040.1 | CEK27020.1 | KFE38026.1 | AJI96167.1     | +              | +              | +                             | + |
| 35      | OprC       | Copper Receptor                        | 81400                             | KGA44083.1 | -          | -          | AJI93749.1     | +              | +              | +                             |   |
| 36      | OprD       | Chitoporin                             | 48400                             | KGA49446.1 | -          | -          | AJI94954.1     | +              | +              | +                             |   |
| 37      | PhnE       | Phosphonate ABC transporter            | 23300                             | -          | CEK27752.1 | KFE39356.1 | -              | -              | +              | +                             |   |
| 38      | ShuA       | Heme receptor                          | 74400                             | KGA51659.1 | CEK27685.1 | KFE39290.1 | AJI93789.1     | +              | +              | +                             | + |
| 39      | Skp        | Chaperone                              | 18300                             | KGA50681.1 | -          | -          | -              | -              | -              | +                             |   |
| 40      | TamA/YtfN  | Autotransporter assembly               | 64800                             | KGA49196.1 | CEK26208.1 | KFE39791.1 | AJI93607.1     | +              | +              | +                             | + |
| 41      | TctC       | Tricarboxylic transport                | 35900                             | -          | CEK26742.1 | KFE38402.1 | AJI95284.1     | -              | -              | +                             | + |

46

47

48 **Table S-1 Continued**

| Protein                      | Function                | MW<br>(Da)                   | Genome (GenBank Accession number) |            |            |            | Location       |                |                | Core<br>proteins <sup>d</sup> |   |
|------------------------------|-------------------------|------------------------------|-----------------------------------|------------|------------|------------|----------------|----------------|----------------|-------------------------------|---|
|                              |                         |                              | ATCC29473                         | CSF007-82  | 37551      | YRB        | 1 <sup>a</sup> | 2 <sup>b</sup> | 3 <sup>c</sup> |                               |   |
| 42                           | ToIC                    | OM Channel (Efflux system)   | 52800                             | KGA50323.1 | CEK28812.1 | KFE37729.1 | AJI94078.1     | +              | +              | +                             | + |
| 43                           | TonB dependent receptor | Iron transport               | 76600                             | KGA49840.1 | CEK26970.1 | KFE38074.1 | AJI94667.1     | +              | +              | +                             | + |
| 44                           | Tsx                     | Colicin/phage receptor       | 29100                             | KGA49816.1 | CEK26700.1 | KFE38363.1 | AJI93985.1     | +              | +              | +                             | + |
| <b>3. Adherence</b>          |                         |                              |                                   |            |            |            |                |                |                |                               |   |
| 45                           | AidA                    | Adhesin                      | 91700                             | KGA49140.1 | CEK28856.1 | KFE40228.1 | AJI94485.1     | -              | -              | +                             | + |
| 46                           | Autotransporter         | Adhesin                      | 78200                             | KGA50029.1 | CEK26284.1 | KFE37415.1 | AJI96502.1     | +              | +              | +                             | + |
| 47                           | FimA                    | Fimbrial protein             | 17900                             | KGA49679.1 | -          | -          | -              | -              | -              | +                             |   |
| 48                           | FimD                    | FimA export and assembly     | 96800                             | KGA43941.1 | CEK28395.1 | KFE38567.1 | AJI93657.1     | +              | +              | +                             | + |
| 49                           | PefC                    | Fimbrial usher               | 86700                             | KGA49043.1 | -          | KFE39434.1 |                | +              | +              | +                             |   |
| 50                           | PilF                    | Minor pilin                  | 27300                             | KGA51554.1 | CEK28422.1 | KFE40152.1 | AJI96335.1     | +              | -              | +                             | + |
| 51                           | PilP                    | Type IV pilus bio.           | 20600                             | KGA44935.1 | -          | -          | -              | +              | -              | +                             |   |
| 52                           | PilQ                    | Type IV pilus biogenesis     | 82500                             | KGA43940.1 | CEK26012.1 | -          | AJI95021.1     | +              | +              | -                             | + |
| 53                           | PilV                    | Minor pilin                  | 42700                             | KGA44898.1 | -          | -          | -              | +              | -              | -                             |   |
| 54                           | PqiB/Mam7               | Adherence                    | 60600                             | -          | CEK27178.1 | KFE40000.1 | -              | +              | -              | -                             |   |
| 55                           | ShIA/HecA/FhaA family   | Heme utilization and adhesin | 418400                            | KGA49502.1 | CEK28851.1 | KFE40224.1 | -              | +              | +              | +                             | + |
| 56                           | SteB                    | Fimbral protein              | 98200                             | KGA49062.1 | CEK28007.1 | KFE38435.1 | -              | +              | -              | +                             | + |
| 57                           | SteJ                    | Fimbrial usher               | 79700                             | KGA49225.1 | CEK26187.1 | -          | -              | +              | +              | +                             |   |
| 58                           | TraL                    | F Pilin formation            | 15800                             | KGA44942.1 | -          | -          | -              | -              | -              | +                             |   |
| 59                           | Fimbral family protein  | Fimbrial bioproteinsis usher | 31400                             | KGA49295.1 | -          | -          | -              | +              | +              | -                             |   |
| 60                           | SfmD                    | Fimbrial usher               | 92300                             | KGA50881.1 | -          | KFE40177.1 | AJI94903.1     | +              | +              | +                             | + |
| <b>4. Enzymatic activity</b> |                         |                              |                                   |            |            |            |                |                |                |                               |   |
| 61                           | BcsC                    | Cellulose biosynthesis       | 128800                            | KGA44060.1 | CEK25913.1 | KFE39041.1 | AJI96493.1     | -              | -              | +                             | + |
| 62                           | Hemolysin               | Hemolysin                    | 157800                            | KGA49858.1 | -          | KFE39468.1 | AJI93845.1     | +              | +              | +                             | + |
| 63                           | LpoA                    | Peptidoglycan synthesis      | 70300                             | KGA43851.1 | CEK28880.1 | KFE40251.1 | AJI94026.1     | +              | -              | +                             | + |

49

50 **Table S-1 Continued**

| Protein            | Function      | MW<br>(Da) | Genome (GenBank Accession number) |            |            |            | Location       |                |                | Core<br>proteins <sup>d</sup> |
|--------------------|---------------|------------|-----------------------------------|------------|------------|------------|----------------|----------------|----------------|-------------------------------|
|                    |               |            | ATCC29473                         | CSF007-82  | 37551      | YRB        | 1 <sup>a</sup> | 2 <sup>b</sup> | 3 <sup>c</sup> |                               |
| 64                 | LpoB          | 20600      | KGA50017.1                        | CEK27239.1 | KFE40058.1 | -          | -              | -              | +              | +                             |
| 65                 | MetQ          | 29300      | KGA50649.1                        | CEK28552.1 | KFE37527.1 | AJI95826.1 | -              | -              | +              | +                             |
| 66                 | MltA          | 42900      | KGA50559.1                        | CEK28603.1 | KFE40370.1 | AJI96420.1 | +              | -              | +              | +                             |
| 67                 | MltB          | 39200      | KGA51419.1                        | CEK28291.1 | KFE37367.1 | AJI96166.1 | +              | -              | +              | +                             |
| 68                 | MltC          | 39900      | KGA50598.1                        | CEK28718.1 | KFE40381.1 | AJI93812.1 | -              | +              | +              | +                             |
| 69                 | MltD          | 52800      | -                                 | CEK26616.1 | -          | AJI95285.1 | +              | -              | -              |                               |
| 70                 | MltE          | 23800      | -                                 | CEK27726.1 | -          | -          | -              | -              | +              |                               |
| 71                 | NlpC          | 25300      | KGA51327.1                        | CEK28556.1 | KFE37531.1 | AJI96307.1 | -              | -              | +              | +                             |
| 72                 | PepM37        | 50500      | -                                 | CEK29247.1 | KFE37810.1 | -          | +              | +              | +              |                               |
| 73                 | Phoslipase A1 | 33700      | KGA44966.1                        | CEK29130.1 | KFE38782.1 | AJI95776.1 | +              | +              | +              | +                             |
| 74                 | PrtF          | 50800      | KGA49670.1                        | -          | KFE39387.1 | -          | +              | +              | +              |                               |
| 75                 | ShlB          | 61900      | KGA43827.1                        | -          | -          | AJI94208.1 | +              | +              | +              |                               |
| 76                 | Spr           | 21700      | KGA51130.1                        | -          | -          | -          | +              | -              | +              |                               |
| 77                 | YfgC          | 53900      | -                                 | CEK28375.1 | KFE40195.1 | -          | +              | -              | +              |                               |
| 78                 | YhIA          | 169600     | -                                 | CEK28999.1 | KFE40367.1 | -          | +              | -              | +              |                               |
| 79                 | Endopeptidase | 16600      | -                                 | -          | KFE37434.1 | AJI94199.1 | +              | -              | +              |                               |
| <b>5. Motility</b> |               |            |                                   |            |            |            |                |                |                |                               |
| 80                 | FlaA          | 44000      | KGA51310.1                        | CEK27960.1 | KFE39630.1 | AJI94147.1 | +              | -              | -              | +                             |
| 81                 | FlgD          | 24200      | KGA51491.1                        | CEK27994.1 | KFE39661.1 | -          | +              | -              | -              | +                             |
| 82                 | FlgE          | 44200      | -                                 | CEK27993.1 | KFE39660.1 | -          | +              | -              | -              |                               |
| 83                 | FlgG          | 27900      | KGA51309.1                        | CEK27991.1 | KFE39658.1 | -          | +              | -              | -              | +                             |
| 84                 | FlgH          | 25300      | KGA51261.1                        | CEK27989.1 | KFE39657.1 | AJI94823.1 | +              | +              | -              | +                             |

51

52

53 **Table S-1 Continued**

| Protein           | Function       | MW<br>(Da)                             | Genome (GenBank Accession number) |            |            |            | Location       |                |                | Core<br>proteins <sup>d</sup> |   |
|-------------------|----------------|----------------------------------------|-----------------------------------|------------|------------|------------|----------------|----------------|----------------|-------------------------------|---|
|                   |                |                                        | ATCC29473                         | CSF007-82  | 37551      | YRB        | 1 <sup>a</sup> | 2 <sup>b</sup> | 3 <sup>c</sup> |                               |   |
| 85                | FlgI           | Flagella P-ring protein                | 36700                             | KGA51583.1 | -          | -          | AJI94007.1     | +              | -              | +                             |   |
| 86                | FlgK           | Hook associated - filament junction    | 58000                             | KGA51150.1 | CEK27986.1 | KFE39654.1 | AJI95156.1     | +              | -              | +                             | + |
| 87                | FlgL           | Hook associated - filament junction    | 35200                             | KGA50945.1 | CEK27985.1 | KFE39653.1 | -              | +              | -              | -                             | + |
| 88                | FliD           | Flagellar filament cap                 | 49100                             | -          | CEK27963.1 | KFE39631.1 | AJI96018.1     | +              | -              | -                             | + |
| 89                | FliF           | Hook length control                    | 51300                             | -          | CEK27977.1 | -          | -              | +              | -              | -                             |   |
| <b>6. Unknown</b> |                |                                        |                                   |            |            |            |                |                |                |                               |   |
| 90                | Lipoprotein 2  | Unknown                                | 23300                             | KGA50955.1 | -          | -          | AJI94414.1     | -              | +              | +                             |   |
| 91                | Lipoprotein 1  | Unknown                                | 20200                             | -          | -          | -          | AJI93913.1     | -              | -              | +                             |   |
| 92                | OM Beta barrel | Unknown                                | 22800                             | KGA50421.1 | CEK27255.1 | -          | AJI96085.1     | +              | +              | +                             | + |
| 93                | Smp            | Unknown                                | 25600                             | KGA50081.1 | -          | -          | AJI94887.1     | -              | -              | +                             |   |
| 94                | YajG           | Unknown                                | 21000                             | KGA49401.1 | -          | -          | AJI93736.1     | -              | -              | +                             |   |
| 95                | YbfN/ChiQ      | Unknown                                | 12000                             | KGA50145.1 | -          | -          | AJI94103.1     | -              | -              | +                             |   |
| 96                | YceB           | Unknown                                | 20500                             | -          | -          | -          | AJI94074.1     | -              | -              | +                             |   |
| 97                | YcfL           | Unknown                                | 14100                             | -          | CEK27238.1 | KFE40057.1 | -              | +              | -              | +                             |   |
| 98                | YdgH           | Unknown                                | 34000                             | -          | CEK27580.1 | KFE39195.1 | -              | +              | -              | +                             |   |
| 99                | YdiY-like      | Salt induced OM protein                | 28000                             | KGA49863.1 | CEK26603.1 | KFE37902.1 | AJI93661.1     | +              | -              | +                             | + |
| 100               | YebT           | Unknown                                | 95100                             | -          | -          | KFE39349.1 | -              | +              | +              | -                             |   |
| 101               | YfaZ           | Unknown                                | 18700                             | KGA51571.1 | CEK28195.1 | KFE38203.1 | AJI93691.1     | +              | -              | +                             | + |
| 102               | YfeY           | Unknown                                | 20900                             | KGA51263.1 | -          | -          | AJI93981.1     | -              | -              | +                             |   |
| 103               | YgiB           | Biofilm formation                      | 23900                             | -          | -          | KFE37730.1 | AJI93763.1     | -              | -              | +                             |   |
| 104               | YiaF           | Unknown                                | 25700                             | -          | -          | -          | AJI94102.1     | -              | -              | +                             |   |
| 105               | YiiQ           | Unknown                                | 21800                             | -          | -          | KFE37795.1 | -              | +              | +              | +                             |   |
| 106               | Yjel           | Unknown                                | 14200                             | KGA44079.1 | -          | -          | -              | -              | +              | +                             |   |
| <b>7. Other</b>   |                |                                        |                                   |            |            |            |                |                |                |                               |   |
| 107               | CsgG           | Curli organelles and biofilm formation | 24000                             | KGA51111.1 | CEK27754.1 | KFE39358.1 | -              | +              | +              | +                             | + |

54 **Table S-1 Continued**

|     | Protein      | Function                               | MW<br>(Da) | Genome (GenBank Accession number) |            |            |            | Location       |                |                | Core<br>proteins <sup>d</sup> |
|-----|--------------|----------------------------------------|------------|-----------------------------------|------------|------------|------------|----------------|----------------|----------------|-------------------------------|
|     |              |                                        |            | ATCC29473                         | CSF007-82  | 37551      | YRB        | 1 <sup>a</sup> | 2 <sup>b</sup> | 3 <sup>c</sup> |                               |
| 108 | GspD         | General secretion path.                | 71400      | KGA49459.1                        | CEK26578.1 | KFE37926.1 | AJI96597.1 | +              | +              | +              | +                             |
| 109 | HmsP         | Biofilm formation                      | 75500      | -                                 | CEK25914.1 | KFE39040.1 | -          | -              | -              | +              |                               |
| 110 | Invasin 1    | Invasion                               | 93100      | KGA44022.1                        | CEK25926.1 | -          | -          | +              | +              | +              |                               |
| 111 | Invasin 2    | Invasion                               | 69400      | -                                 | -          | KFE40369.1 | -          | +              | +              | +              |                               |
| 112 | MipA         | MltA interacting                       | 28000      | KGA49714.1                        | CEK27425.1 | KFE39524.1 | AJI95499.1 | +              | +              | +              | +                             |
| 113 | Nlpl         | Cell division                          | 33800      | KGA49038.1                        | CEK26241.1 | KFE39758.1 | -          | -              | -              | +              | +                             |
| 114 | OsmB         | Osmotically inducible                  | 6800       | -                                 | CEK27515.1 | KFE39134.1 | AJI96131.1 | -              | -              | +              | +                             |
| 115 | OutS         | Secretion                              | 14500      | -                                 | CEK26567.1 | KFE37937.1 | -          | -              | -              | +              |                               |
| 116 | RcpA         | Pilus secretion                        | 48300      | -                                 | CEK28783.1 | KFE37699.1 | -          | -              | +              | +              |                               |
| 117 | RcsF         | Phosphorelay signaling path            | 14500      | KGA50578.1                        | CEK28553.1 | KFE37528.1 | -          | -              | -              | +              | +                             |
| 118 | RlpA         | Rod shape and daughter cell separation | 37600      | KGA50174.1                        | CEK26858.1 | KFE38505.1 | AJI95197.1 | +              | -              | +              | +                             |
| 119 | TTSS protein | TTSS protein                           | 45900      | -                                 | -          | -          | AJI96607.1 | +              | -              | -              |                               |
| 120 | TadD         | Pilus assembly                         | 28500      | -                                 | -          | KFE37706.1 | -          | -              | -              | +              |                               |
| 121 | TraN         | F Plasmid conj. Transfer               | 35600      | KGA44907.1                        | -          | -          | -          | -              | -              | +              |                               |
| 122 | YdgA         | Serine protease                        | 29300      | -                                 | -          | -          | AJI93679.1 | -              | -              | +              |                               |
| 123 | YiaD/Omp16   | Multicopy suppressor of BamD           | 22200      | -                                 | CEK25848.1 | KFE39573.1 | -          | +              | +              | +              |                               |
| 124 | YnbE         | YnbE-like                              | 7400       | KGA51004.1                        | -          | -          | -          | -              | -              | +              |                               |
| 125 | Yrap         | Phospholipid biogenesis                | 20200      | -                                 | CEK28883.1 | KFE40254.1 | AJI96212.1 | +              | -              | +              | +                             |
| 126 | YscC         | Type III secretion OM pore             | 63000      | -                                 | CEK26541.1 | KFE37959.1 | AJI94017.1 | +              | +              | +              | +                             |
| 127 | YscJ         | Yop protein export                     | 27500      | -                                 | CEK26536.1 | KFE37964.1 | AJI93682.1 | +              | -              | +              | +                             |

55

56



57 **Table S-1 Continued**

| Protein                | Function        | MW<br>(Da)   | Genome (GenBank Accession number) |            |            |            | Location       |                |                | Core<br>proteins <sup>d</sup> |           |
|------------------------|-----------------|--------------|-----------------------------------|------------|------------|------------|----------------|----------------|----------------|-------------------------------|-----------|
|                        |                 |              | ATCC29473                         | CSF007-82  | 37551      | YRB        | 1 <sup>a</sup> | 2 <sup>b</sup> | 3 <sup>c</sup> |                               |           |
| <b>8. Hypothetical</b> |                 |              |                                   |            |            |            |                |                |                |                               |           |
| 128                    | Hypothetical 12 | Hypothetical | 10800                             | -          | -          | -          | AJI94018.1     | -              | -              | +                             |           |
| 129                    | Hypothetical 10 | Hypothetical | 12200                             | -          | CEK27624.1 | KFE39235.1 | -              | +              | -              | +                             |           |
| 130                    | Hypothetical 9  | Hypothetical | 12200                             | -          | CEK27596.1 | KFE39209.1 | -              | +              | -              | +                             |           |
| 131                    | Hypothetical 14 | Hypothetical | 22900                             | -          | -          | KFE40074.1 | AJI93929.1     | +              | +              | +                             |           |
| 132                    | Hypothetical 7  | Hypothetical | 22900                             | KGA49308.1 | -          | KFE39813.1 | AJI93964.1     | +              | +              | +                             | +         |
| 133                    | Hypothetical 4  | Hypothetical | 24600                             | KGA51273.1 | -          | -          | -              | +              | -              | +                             |           |
| 134                    | Hypothetical 6  | Hypothetical | 26400                             | -          | CEK28680.1 | KFE40416.1 | AJI94033.1     | +              | -              | +                             | +         |
| 135                    | Hypothetical 8  | Hypothetical | 26500                             | -          | CEK28711.1 | KFE40387.1 | -              | +              | -              | +                             |           |
| 136                    | Hypothetical 1  | Hypothetical | 30000                             | -          | CEK27557.1 | KFE39173.1 | AJI93918.1     | +              | +              | +                             | +         |
| 137                    | Hypothetical 5  | Hypothetical | 33500                             | KGA49345.1 | CEK26826.1 | KFE38476.1 | AJI93943.1     | +              | +              | -                             | +         |
| 138                    | Hypothetical 13 | Hypothetical | 35300                             | KGA49328.1 | CEK26283.1 | KFE37414.1 | -              | +              | +              | +                             | +         |
| 139                    | Hypothetical 11 | Hypothetical | 50300                             | -          | -          | -          | AJI93705.1     | +              | -              | +                             |           |
| 140                    | Hypothetical 3  | Hypothetical | 75200                             | KGA43980.1 | -          | KFE39064.1 | -              | +              | +              | +                             |           |
| 141                    | Hypothetical 2  | Hypothetical | 80800                             | KGA44017.1 | -          | KFE39572.1 | -              | -              | +              | +                             |           |
|                        |                 |              | <b>Total</b>                      | <b>97</b>  | <b>93</b>  | <b>102</b> | <b>88</b>      | <b>94</b>      | <b>63</b>      | <b>122</b>                    | <b>77</b> |

58

59 <sup>a</sup>Proteins identified by subcellular localisation prediction programmes; <sup>b</sup>Proteins identified by  $\beta$ -barrel prediction programmes; <sup>c</sup>Proteins  
60 identified by lipoprotein prediction programmes; <sup>d</sup>Proteins predicted in at least three out of four genomes representing the 'core' outer  
61 membrane proteome.

62

63 **Table S-2** Proteins identified by gel-free proteomic analysis of eight isolates of *Y. ruckeri*.

| NCBI RefSeq number | Protein        | Function              | MW (Da)                        | Rainbow trout |      |      |       | Atlantic salmon |       |       |       | Prediction |   |
|--------------------|----------------|-----------------------|--------------------------------|---------------|------|------|-------|-----------------|-------|-------|-------|------------|---|
|                    |                |                       |                                | RD6           | RD28 | RD64 | RD124 | RD354           | RD366 | RD382 | RD420 |            |   |
| 1                  | WP_004717998.1 | BamB                  | BAM complex                    | 42,328        | +    | +    | +     | +               | +     | +     | +     | +          | + |
| 2                  | WP_004700255.1 | Lpp (Brauns)          | Anchors peptidoglycan to OM    | 6,687         | +    | +    | +     | +               | +     | +     | +     | +          | + |
| 3                  | WP_004722151.1 | Pal                   | Peptidoglycan associated       | 18,103        | +    | +    | +     | +               | +     | +     | +     | +          | + |
| 4                  | WP_004718926.1 | OmpA                  | OM integrity, porin, adherence | 37,756        | +    | +    | +     | +               | +     | +     | +     | +          | + |
| 5                  | WP_071704305.1 | OmpF                  | Porin (Small molecules)        | 40,049        | +    | +    | +     | +               | +     | +     | +     | +          | + |
| 6                  | WP_004719660.1 | BamA/YaeT             | BAM complex                    | 88,077        | +    | +    | +     | +               | +     | +     | +     | +          | + |
| 7                  | WP_004719968.1 | OsmY                  | Osmoregulation                 | 11,017        | +    | +    | +     | +               | +     | +     | +     | +          | - |
| 8                  | WP_038251462.1 | Flagellin (FlaA)      | Flagellin                      | 43,615        | -    | +    | +     | +               | +     | +     | +     | +          | + |
| 9                  | WP_004720730.1 | FlgE                  | Links flagella to driver       | 44,281        | -    | +    | +     | +               | +     | +     | +     | +          | + |
| 10                 | WP_004717911.1 | VacJ/MlaA             | Phospholipid homeostasis       | 28,735        | +    | +    | +     | +               | +     | +     | +     | +          | + |
| 11                 | WP_004719617.1 | MetQ                  | D-methionine binding           | 29,316        | +    | +    | +     | +               | +     | +     | +     | +          | + |
| 12                 | WP_004723390.1 | YeeJ                  | Unknown                        | 54,668        | +    | +    | +     | +               | +     | +     | +     | +          | - |
| 13                 | WP_004717779.1 | TcyP                  | Cysteine transporter           | 48,096        | +    | +    | +     | +               | +     | +     | +     | +          | - |
| 14                 | WP_004722544.1 | ShIB/FhaC/HecB family | Hemolysin activator            | 62,461        | +    | +    | +     | +               | +     | +     | +     | +          | + |
| 15                 | WP_004722316.1 | BamC                  | BAM complex                    | 38,311        | +    | +    | +     | +               | +     | +     | +     | +          | + |
| 16                 | WP_004717609.1 | Pcp/SlyB              | Membrane integrity             | 15,334        | +    | +    | +     | +               | +     | +     | +     | +          | + |
| 17                 | WP_004717812.1 | OmpC.1                | Porin (Small molecules)        | 40,484        | +    | +    | -     | -               | -     | +     | -     | -          | + |
| 18                 | WP_004717101.1 | OmpE                  | Inorganic phosphate uptake     | 39,949        | +    | +    | +     | +               | +     | +     | +     | +          | + |
| 19                 | WP_004723240.1 | BcsC                  | Cellulose biosynthesis         | 126,490       | +    | +    | +     | +               | +     | +     | +     | +          | + |

64

**Table S-2 Continued**

| NCBI RefSeq number | Protein        | Function                                        | MW (Da)                            | Rainbow trout |      |      |       | Atlantic salmon |       |       |       | Prediction |   |   |
|--------------------|----------------|-------------------------------------------------|------------------------------------|---------------|------|------|-------|-----------------|-------|-------|-------|------------|---|---|
|                    |                |                                                 |                                    | RD6           | RD28 | RD64 | RD124 | RD354           | RD366 | RD382 | RD420 |            |   |   |
| 20                 | WP_004719814.1 | Slp Family                                      | Structural and OM stabilisation    | 20,645        | +    | -    | -     | +               | +     | +     | +     | +          | + | + |
| 21                 | WP_004723105.1 | BamD                                            | BAM complex                        | 27,392        | +    | +    | +     | +               | +     | +     | -     | -          | + | + |
| 22                 | WP_004719859.1 | MipA                                            | MltA interacting                   | 28,040        | +    | +    | +     | +               | -     | +     | +     | +          | + | + |
| 23                 | WP_004722195.1 | YqjD                                            | Unknown                            | 26,277        | +    | +    | -     | +               | +     | +     | +     | +          | + | - |
| 24                 | WP_004718264.1 | YiaD/Omp16                                      | Multicopy suppressor of BamD       | 22,248        | +    | +    | +     | +               | +     | +     | +     | +          | + | + |
| 25                 | WP_004719715.1 | MltA                                            | Peptidoglycan maintenance          | 42,866        | +    | +    | +     | +               | +     | +     | +     | +          | + | + |
| 26                 | WP_004723357.1 | C-terminal protease                             | Unknown                            | 75,933        | +    | +    | +     | +               | -     | +     | -     | +          | - | - |
| 27                 | WP_004720193.1 | LptE/RlpB                                       | LPS assembly                       | 21,089        | +    | +    | +     | +               | +     | +     | -     | +          | + | + |
| 28                 | WP_004723375.1 | ShIA/FhaA/HecA family                           | Adhesin                            | 155,563       | +    | +    | +     | -               | +     | -     | -     | -          | - | + |
| 29                 | WP_004717528.1 | HslJ                                            | Heat-inducible protein             | 15,597        | +    | +    | +     | +               | +     | +     | +     | +          | + | - |
| 30                 | WP_004721031.1 | ToIC                                            | OM Channel (Efflux system)         | 53,080        | +    | +    | +     | +               | +     | +     | +     | +          | + | + |
| 31                 | WP_004718068.1 | YfhG/QseG                                       | Quorum sensing/Virulence           | 34,809        | +    | +    | +     | +               | +     | +     | +     | +          | + | - |
| 32                 | WP_004720126.1 | Hypothetical 5                                  | Unknown                            | 31,358        | +    | +    | -     | +               | +     | +     | -     | -          | - | + |
| 33                 | WP_004721707.1 | CsgG                                            | Curli organelles/biofilm formation | 24,670        | +    | -    | +     | -               | +     | -     | -     | -          | - | + |
| 34                 | WP_004722541.1 | Filamentous hemagglutinin, partial <sup>a</sup> | Filamentous haemagglutinin         | 48,764        | +    | -    | -     | +               | -     | -     | -     | -          | - | - |
| 35                 | WP_004723020.1 | TamA/YtfN                                       | Autotransporter assembly           | 63,376        | +    | -    | -     | +               | +     | -     | +     | +          | + | + |
| 36                 | WP_004720881.1 | ShuA                                            | Heme receptor                      | 73,397        | +    | -    | -     | +               | -     | -     | +     | -          | - | + |
| 37                 | WP_004722118.1 | TTSS protein <sup>a</sup>                       | Type III secretion protein         | 61,640        | +    | -    | -     | -               | -     | -     | -     | -          | - | + |
| 38                 | WP_004717487.1 | Hypothetical 15 <sup>a</sup>                    | Unknown                            | 34,982        | +    | +    | -     | -               | -     | -     | -     | -          | - | - |

67 **Table S-2 Continued**

| NCBI RefSeq number | Protein        | Function                     | MW (Da)                        | Rainbow trout |      |      |       | Atlantic salmon |       |       |       | Prediction |   |
|--------------------|----------------|------------------------------|--------------------------------|---------------|------|------|-------|-----------------|-------|-------|-------|------------|---|
|                    |                |                              |                                | RD6           | RD28 | RD64 | RD124 | RD354           | RD366 | RD382 | RD420 |            |   |
| 39                 | WP_004717681.1 | HemR                         | Iron transport                 | 72,952        | +    | +    | +     | +               | +     | +     | +     | -          | - |
| 40                 | WP_004719473.1 | BtuB                         | Vitamin B12 transport          | 68,999        | +    | +    | +     | -               | -     | +     | +     | -          | + |
| 41                 | WP_004718497.1 | OprC                         | Chitoporin                     | 75,008        | +    | +    | -     | +               | +     | +     | +     | +          | + |
| 42                 | WP_004720628.1 | OmpC.2                       | Porin (Small molecules)        | 39,971        | +    | +    | -     | +               | -     | +     | +     | +          | + |
| 43                 | WP_004718917.1 | PqiB/MAM7                    | Adherence                      | 59,670        | +    | -    | +     | -               | +     | -     | -     | -          | + |
| 44                 | WP_004718988.1 | Hypothetical 16              | Endonuclease/Exonuclease       | 56,471        | +    | -    | +     | -               | -     | -     | -     | +          | - |
| 45                 | WP_004723305.1 | LpoA/LppC <sup>a</sup>       | Peptidoglycan synthesis        | 74,138        | +    | -    | -     | +               | -     | -     | -     | -          | + |
| 46                 | WP_004721574.1 | LptD <sup>a</sup>            | LPS assembly                   | 89,597        | +    | -    | -     | -               | -     | -     | -     | -          | + |
| 47                 | WP_004721563.1 | Hypothetical 20 <sup>a</sup> | Membrane associated            | 17,747        | +    | -    | -     | -               | -     | -     | -     | -          | - |
| 48                 | WP_004722010.1 | FhuA <sup>a</sup>            | Ferric hydroxymate receptor    | 81,661        | +    | -    | -     | -               | -     | -     | -     | -          | + |
| 49                 | WP_004723308.1 | YraP                         | Phospholipid biogenesis        | 20,176        | -    | +    | +     | +               | +     | +     | -     | +          | + |
| 50                 | WP_004719577.1 | Pep M37 <sup>a</sup>         | Enzymatic activity             | 50,517        | -    | +    | -     | -               | -     | -     | -     | -          | + |
| 51                 | WP_004717303.1 | Lipoprotein 1 <sup>a</sup>   | Unknown                        | 20,214        | -    | +    | -     | -               | -     | -     | -     | -          | + |
| 52                 | WP_004722456.1 | Blc <sup>a</sup>             | Lipid storage/transport        | 20,700        | -    | +    | -     | -               | -     | -     | -     | -          | + |
| 53                 | WP_004720682.1 | FliD                         | Flagellar filament cap         | 49,084        | -    | -    | +     | -               | +     | +     | -     | -          | + |
| 54                 | WP_004719093.1 | Hypothetical 18 <sup>a</sup> | Unknown                        | 54,586        | -    | -    | +     | +               | -     | -     | -     | -          | - |
| 55                 | WP_004718688.1 | YajG <sup>a</sup>            | Unknown                        | 20,929        | -    | -    | +     | -               | -     | -     | -     | -          | + |
| 56                 | WP_004719967.1 | OmpW <sup>a</sup>            | Hydrophobic compound transport | 23,880        | -    | -    | +     | -               | -     | -     | -     | -          | + |
| 57                 | WP_004719291.1 | MltC <sup>a</sup>            | Peptidoglycan maintenance      | 39,902        | -    | -    | +     | -               | -     | -     | -     | -          | + |

68

69 **Table S-2 Continued**

| NCBI RefSeq number | Protein        | Function                      | MW (Da)                       | Rainbow trout |           |           |           | Atlantic salmon |           |           |           | Prediction |           |
|--------------------|----------------|-------------------------------|-------------------------------|---------------|-----------|-----------|-----------|-----------------|-----------|-----------|-----------|------------|-----------|
|                    |                |                               |                               | RD6           | RD28      | RD64      | RD124     | RD354           | RD366     | RD382     | RD420     |            |           |
| 58                 | WP_004718346.1 | Hypothetical 19 <sup>a</sup>  | Unknown                       | 51,997        | -         | -         | +         | -               | -         | -         | -         | -          | -         |
| 59                 | WP_004722010.1 | RupA <sup>b</sup>             | Ruckerbactin reception        | 17,892        | -         | -         | -         | -               | -         | +         | -         | -          | -         |
| 60                 | WP_004722673.1 | SecD <sup>a</sup>             | General secretion path.       | 71,754        | -         | -         | -         | +               | -         | -         | -         | -          | +         |
| 61                 | WP_004717910.1 | FadL <sup>b</sup>             | Fatty acid compound transport | 46,063        | -         | -         | -         | -               | +         | -         | -         | +          | +         |
| 62                 | WP_004721213.1 | TpsB family <sup>b</sup>      | Hemolysin activator           | 61,725        | -         | -         | -         | -               | -         | -         | +         | +          | -         |
| 63                 | WP_004720181.1 | RlpA <sup>b</sup>             | Rod shape cell separation     | 37,557        | -         | -         | -         | -               | -         | -         | -         | +          | +         |
| 64                 | WP_004718110.1 | Phospholipase A1 <sup>b</sup> | Bacteriocin secretion         | 32,533        | -         | -         | -         | -               | -         | -         | -         | +          | +         |
| <b>Total</b>       |                |                               |                               |               | <b>46</b> | <b>40</b> | <b>40</b> | <b>40</b>       | <b>37</b> | <b>38</b> | <b>33</b> | <b>37</b>  | <b>48</b> |

70

71 Boxes coloured red, orange and yellow represent proteins identified in 3, 2 and 1 replicate, respectively. <sup>a</sup>Proteins identified solely in isolates  
 72 recovered from Rainbow trout; <sup>b</sup>Proteins identified solely in isolates recovered from Atlantic salmon.

73

74 **Table S-3 Additional OMPs identified through gel-based proteomics of *Y. ruckeri*.**

|   | <b>NCBI RefSeq number</b> | <b>Protein</b> | <b>Function</b>              | <b>MW (Da)</b> | <b>Gel position<sup>a</sup></b> | <b>Prediction</b> |
|---|---------------------------|----------------|------------------------------|----------------|---------------------------------|-------------------|
| 1 | WP_004718264.1            | YiaD/Omp16     | Multicopy suppressor of BamD | 22,248         | 20                              | +                 |
| 2 | WP_004720181.1            | RlpA           | Rod shape cell separation    | 37,557         | 38                              | +                 |
| 3 | WP_042527118.1            | Surface Ag     | Antigen                      | 64,555         | 41                              | -                 |
| 4 | WP_038241510.1            | MalA           | Macrolide transporter        | 40,203         | 42                              | -                 |
|   |                           |                |                              | <b>Total</b>   | <b>4</b>                        | <b>2</b>          |

75 <sup>a</sup>These numbers represent the position of the protein on the gel in Fig. S-2

76

77 **Table S-4 Proteins identified in eight isolates of *Y. ruckeri* through a combination of gel-free and gel-based proteomic techniques.**

|    | NCBI RefSeq number | Protein          | Function                           | MW (Da) | Predicted | Gel-free | L-S <sup>a</sup> | I-B <sup>b</sup> | Other-gel |
|----|--------------------|------------------|------------------------------------|---------|-----------|----------|------------------|------------------|-----------|
| 1  | WP_071704305.1     | OmpF             | Porin (Small molecules)            | 40,049  | +         | +        | +                | +                | -         |
| 2  | WP_004700255.1     | Lpp (Brauns)     | Anchors peptidoglycan to OM        | 6,687   | +         | +        | +                | +                | -         |
| 3  | WP_004717101.1     | OmpE             | Inorganic phosphate uptake         | 39,949  | +         | +        | +                | +                | -         |
| 4  | WP_004717609.1     | Pcp/SlyB         | Membrane integrity                 | 15,334  | +         | +        | +                | +                | -         |
| 5  | WP_004717812.1     | OmpC.1           | Porin (Small molecules)            | 40,484  | +         | +        | +                | +                | -         |
| 6  | WP_004717910.1     | FadL             | Fatty acid compound trans.         | 46,063  | +         | +        | +                | +                | -         |
| 7  | WP_004717911.1     | VacJ/MlaA        | Phospholipid homeostasis           | 28,735  | +         | +        | +                | +                | -         |
| 8  | WP_004718110.1     | Phospholipase A1 | Bacteriocin secretion              | 32,533  | +         | +        | +                | +                | -         |
| 9  | WP_004718688.1     | YajG             | Unknown                            | 20,929  | +         | +        | +                | +                | -         |
| 10 | WP_004718926.1     | OmpA             | OM integrity, porin, adherence     | 37,756  | +         | +        | +                | +                | -         |
| 11 | WP_004719473.1     | BtuB             | Vitamin B12 transport              | 68,999  | +         | +        | +                | +                | -         |
| 12 | WP_004719617.1     | MetQ             | D-methionine binding               | 29,316  | +         | +        | +                | +                | -         |
| 13 | WP_004719660.1     | BamA/YaeT        | BAM complex                        | 88,077  | +         | +        | +                | +                | -         |
| 14 | WP_004719859.1     | MipA             | MltA interacting                   | 28,040  | +         | +        | +                | +                | -         |
| 15 | WP_004719967.1     | OmpW             | Hydrophobic compound transport     | 23,880  | +         | +        | +                | +                | -         |
| 16 | WP_004720193.1     | LptE/RlpB        | LPS assembly                       | 21,089  | +         | +        | +                | +                | -         |
| 17 | WP_004720628.1     | OmpC.2           | Porin (Small molecules)            | 39,971  | +         | +        | +                | +                | -         |
| 18 | WP_004720730.1     | FlgE             | Links flagella to driver           | 44,281  | +         | +        | +                | +                | -         |
| 19 | WP_004720881.1     | ShuA             | Heme transport                     | 73,397  | +         | +        | +                | +                | -         |
| 20 | WP_004721031.1     | ToIC             | OM Channel (Efflux system)         | 53,080  | +         | +        | +                | +                | -         |
| 21 | WP_004721574.1     | LptD             | LPS assembly                       | 89,597  | +         | +        | +                | +                | -         |
| 22 | WP_004721707.1     | CsgG             | Curli organelles/biofilm formation | 24,670  | +         | +        | +                | +                | -         |

78

79 **Table S-4 Continued**

|    | NCBI RefSeq number | Protein               | Function                        | MW (Da) | Predicted | Gel-free | L-S <sup>a</sup> | I-B <sup>b</sup> | Other-gel |
|----|--------------------|-----------------------|---------------------------------|---------|-----------|----------|------------------|------------------|-----------|
| 23 | WP_004722151.1     | Pal                   | Peptidoglycan associated        | 18,103  | +         | +        | +                | +                | -         |
| 24 | WP_004722316.1     | BamC                  | BAM complex                     | 38,311  | +         | +        | +                | +                | -         |
| 25 | WP_004723020.1     | TamA/YtfN             | Autotransporter assembly        | 63,376  | +         | +        | +                | +                | -         |
| 26 | WP_004723105.1     | BamD                  | BAM complex                     | 27,392  | +         | +        | +                | +                | -         |
| 27 | WP_004723240.1     | BcsC                  | Cellulose biosynthesis          | 126,490 | +         | +        | +                | +                | -         |
| 28 | WP_038251462.1     | Flagellin (FlaA)      | Flagellin                       | 43,615  | +         | +        | +                | +                | -         |
| 29 | WP_004717303.1     | Lipoprotein 1         | Unknown                         | 20,214  | +         | +        | +                | -                | -         |
| 30 | WP_004717998.1     | BamB                  | BAM complex                     | 42,328  | +         | +        | +                | -                | -         |
| 31 | WP_004718497.1     | OprC                  | Chitoporin                      | 75,008  | +         | +        | +                | -                | -         |
| 32 | WP_004719715.1     | MltA                  | Peptidoglycan maintenance       | 42,866  | +         | +        | +                | -                | -         |
| 33 | WP_004719814.1     | Slp family            | Structural and OM stabilisation | 20,645  | +         | +        | +                | -                | -         |
| 34 | WP_004718264.1     | YiaD/Omp16            | Multicopy suppressor of BamD    | 22,248  | +         | +        | -                | -                | +         |
| 35 | WP_004720181.1     | RlpA <sup>d</sup>     | Rod shape cell separation       | 37,557  | +         | +        | -                | -                | +         |
| 36 | WP_004718917.1     | PqiB/MAM7             | Adherence                       | 59,670  | +         | +        | -                | -                | -         |
| 37 | WP_004719291.1     | MltC <sup>c</sup>     | Peptidoglycan maintenance       | 39,902  | +         | +        | -                | -                | -         |
| 38 | WP_004719577.1     | Pep M37 <sup>c</sup>  | Enzymatic activity              | 50,517  | +         | +        | -                | -                | -         |
| 39 | WP_004720126.1     | Hypothetical 5        | Unknown                         | 31,358  | +         | +        | -                | -                | -         |
| 40 | WP_004720682.1     | FliD                  | Flagellar filament cap          | 49,084  | +         | +        | -                | -                | -         |
| 41 | WP_004722010.1     | FhuA                  | Ferric hydroxymate receptor     | 81,661  | +         | +        | -                | -                | -         |
| 42 | WP_004722118.1     | TTSS protein          | Type III secretion protein      | 61,640  | +         | +        | -                | -                | -         |
| 43 | WP_004722456.1     | Blc                   | Lipid storage/transport         | 20,700  | +         | +        | -                | -                | -         |
| 44 | WP_004722544.1     | ShIB/FhaC/HecB family | Hemolysin activator             | 62,461  | +         | +        | -                | -                | -         |

80

81



82 **Table S-4 Continued**

|    | <b>NCBI RefSeq number</b> | <b>Protein</b>        | <b>Function</b>                 | <b>MW (Da)</b> | <b>Predicted</b> | <b>Gel-free</b> | <b>L-S<sup>a</sup></b> | <b>I-B<sup>b</sup></b> | <b>Other-gel</b> |
|----|---------------------------|-----------------------|---------------------------------|----------------|------------------|-----------------|------------------------|------------------------|------------------|
| 45 | WP_004722673.1            | SecD                  | General secretion path.         | 71,754         | +                | +               | -                      | -                      | -                |
| 46 | WP_004723305.1            | LpoA/LppC             | Peptidoglycan synthesis         | 74,138         | +                | +               | -                      | -                      | -                |
| 47 | WP_004723308.1            | YraP                  | Phospholipid biogenesis         | 20,176         | +                | +               | -                      | -                      | -                |
| 48 | WP_004723375.1            | ShIA/FhaA/HecA family | Adhesin                         | 155,563        | +                | +               | -                      | -                      | -                |
| 49 | WP_038244358.1            | OmpX                  | Virulence                       | 17,086         | +                | -               | +                      | +                      | -                |
| 50 | WP_004718684.1            | Tsx                   | Nucleoside channel/Colicin rec. | 29,122         | +                | -               | +                      | +                      | -                |
| 51 | WP_099511713.1            | PilV                  | Major Pilin                     | 48,727         | +                | -               | +                      | +                      | -                |
| 52 | WP_042526217.1            | Hypothetical 12       | Unknown                         | 11,794         | +                | -               | +                      | +                      | -                |
| 53 | WP_004720405.1            | Nlpl                  | Cell division                   | 33,918         | +                | -               | +                      | -                      | -                |
| 54 | WP_038242024.1            | FlgH                  | Flagella L-ring protein         | 13,149         | +                | -               | +                      | -                      | -                |
| 55 | WP_004717693.1            | NlpC/CutF             | Copper homeostasis              | 25,530         | +                | -               | +                      | -                      | -                |
| 56 | WP_038241300.1            | BamE                  | BAM complex                     | 12,651         | +                | -               | +                      | -                      | -                |
| 57 | WP_042524944.1            | YdgA                  | GTP-binding protein             | 54,395         | +                | -               | +                      | -                      | -                |
| 58 | WP_004719021.1            | LpoB                  | Peptidoglycan synthesis         | 20,698         | +                | -               | -                      | +                      | -                |
| 59 | WP_004722810.1            | Hypothetical 13       | Unknown                         | 34,471         | +                | -               | -                      | +                      | -                |
| 60 | WP_038241996.1            | FliF                  | Flagellar machinery             | 61,743         | +                | -               | -                      | +                      | -                |
| 61 | WP_004719968.1            | OsmY                  | Osmoregulation                  | 11,017         | -                | +               | +                      | -                      | -                |
| 62 | WP_004722010.1            | RupA                  | Ruckerbactin reception          | 17,892         | -                | +               | -                      | -                      | -                |
| 63 | WP_004717487.1            | Hypothetical 15       | Unknown                         | 34,982         | -                | +               | -                      | -                      | -                |
| 64 | WP_004717528.1            | HslJ                  | Heat-inducible protein          | 15,597         | -                | +               | -                      | -                      | -                |
| 65 | WP_004717681.1            | HemR                  | Iron transport                  | 72,952         | -                | +               | -                      | -                      | -                |
| 66 | WP_004717779.1            | TcyP                  | Cysteine transporter            | 48,096         | -                | +               | -                      | -                      | -                |

83

84

85 **Table S-4 Continued**

|    | NCBI RefSeq number | Protein                            | Function                           | MW (Da)      | Predicted | Gel-free  | L-S <sup>a</sup> | I-B <sup>b</sup> | Other-gel |
|----|--------------------|------------------------------------|------------------------------------|--------------|-----------|-----------|------------------|------------------|-----------|
| 67 | WP_004718068.1     | YfhG/QseG                          | Quorum sensing/Virulence           | 34,809       | -         | +         | -                | -                | -         |
| 68 | WP_004718346.1     | Hypothetical 19                    | Unknown                            | 51,997       | -         | +         | -                | -                | -         |
| 69 | WP_004718988.1     | Hypothetical 16                    | Unknown                            | 56,471       | -         | +         | -                | -                | -         |
| 70 | WP_004719093.1     | Hypothetical 18                    | Unknown                            | 54,586       | -         | +         | -                | -                | -         |
| 71 | WP_004721213.1     | TpsB family                        | Hemolysin activator                | 61,725       | -         | +         | -                | -                | -         |
| 72 | WP_004722195.1     | YqjD                               | Unknown                            | 26,277       | -         | +         | -                | -                | -         |
| 73 | WP_004722541.1     | Filamentous hemagglutinin, partial | Filamentous haemagglutinin         | 48,764       | -         | +         | -                | -                | -         |
| 74 | WP_004723357.1     | C-terminal protease                | Unknown                            | 75,933       | -         | +         | -                | -                | -         |
| 75 | WP_004723390.1     | YeeJ                               | Unknown                            | 54,668       | -         | +         | -                | -                | -         |
| 76 | WP_004717668.1     | GlpC                               | Iron-Sulfur protein                | 115,110      | -         | -         | +                | +                | -         |
| 77 | WP_004721563.1     | Hypothetical 20                    | Unknown                            | 17,747       | -         | +         | +                | +                | -         |
| 78 | WP_004723092.1     | Membrane protein                   | Unknown                            | 27,916       | -         | -         | +                | +                | -         |
| 79 | WP_038242171.1     | Lipoprotein 3                      | OM lipoprotein                     | 11,336       | -         | -         | +                | -                | -         |
| 80 | WP_004719153.1     | NlpD                               | Unknown                            | 34,142       | -         | -         | -                | +                | -         |
| 81 | WP_004717948.1     | YegD/Hsp70                         | Heat shock protein                 | 49,742       | -         | -         | -                | +                | -         |
| 82 | WP_004721184.1     | DauA                               | Sodium-independent anion transport | 60,560       | -         | -         | -                | +                | -         |
| 83 | WP_038241510.1     | MalA                               | Macrolide transporter              | 40,203       | -         | -         | -                | -                | +         |
| 84 | WP_042527118.1     | Surface Ag                         | Antigen                            | 64,555       | -         | -         | -                | -                | +         |
|    |                    |                                    |                                    | <b>Total</b> | <b>60</b> | <b>64</b> | <b>47</b>        | <b>41</b>        | <b>4</b>  |

86

87 <sup>a</sup>L-S represents the lane-section approach; <sup>b</sup>I-B represents the individual band approach; <sup>c</sup>Proteins identified solely in isolates recovered from  
88 Rainbow trout; <sup>d</sup>Proteins identified solely in isolates recovered from Atlantic salmon.

89

90 **Table S-5** Functional categories of 141 predicted OMPs in four *Y. ruckeri* genomes

| <b>al Category</b>          | <b>Total number of proteins</b> | <b>Number of core proteins (%)</b> |
|-----------------------------|---------------------------------|------------------------------------|
| OM Biogenesis and integrity | 15                              | 12 (80)                            |
| Transport and receptor      | 29                              | 15 (52)                            |
| Adherence                   | 16                              | 4 (25)                             |
| Enzymatic activities        | 19                              | 8 (42)                             |
| Motility                    | 10                              | 3 (30)                             |
| Other function              | 21                              | 3 (12)                             |
| Unknown function            | 17                              | 2 (14)                             |
| Hypothetical                | 14                              | 1 (7)                              |

91

92
